# Supplementary material
Source: PubMed Central journal article supplement (PMC6774262)

**A. Auditory Cortex**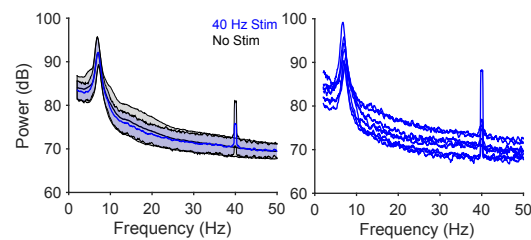**B.**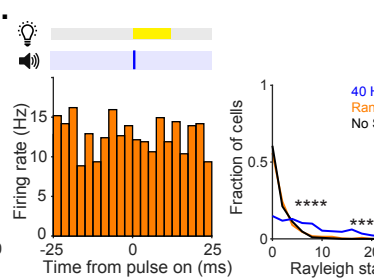**C.**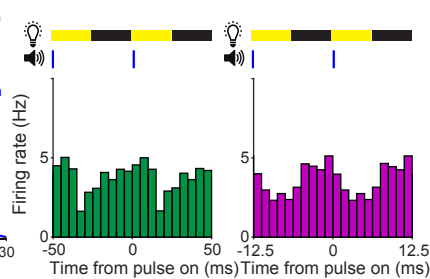**D.**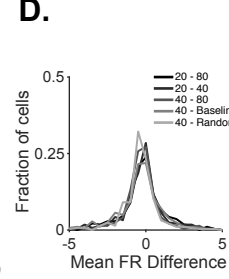**E.**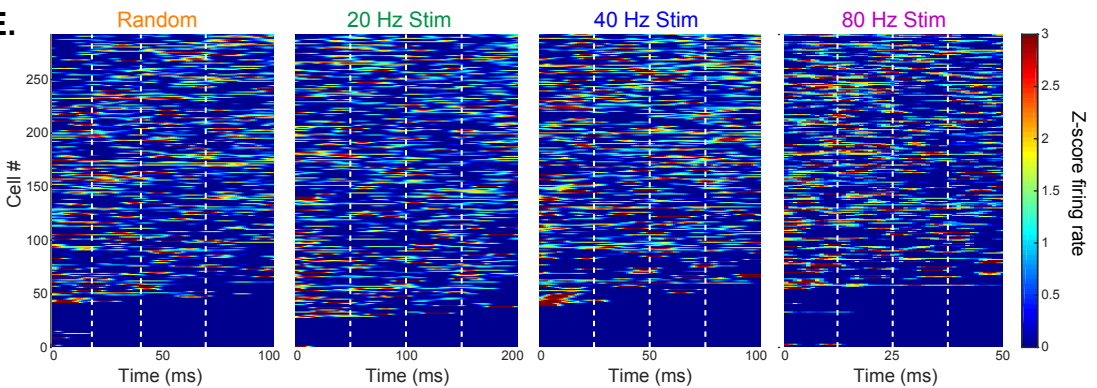**F.**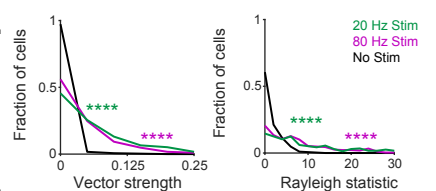**G.**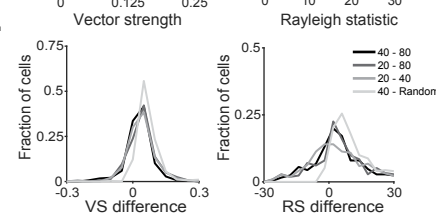**H. Hippocampus**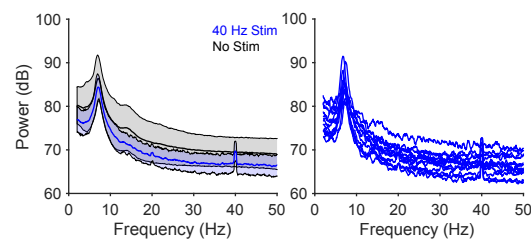**I.**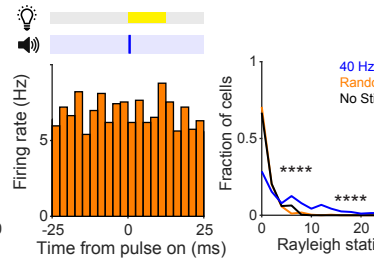**J.**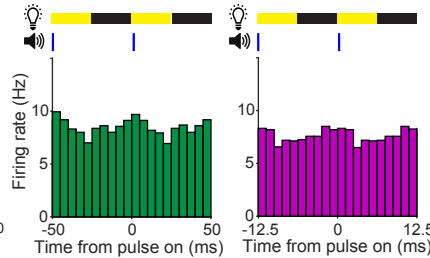**K.**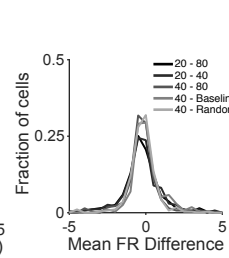**L.**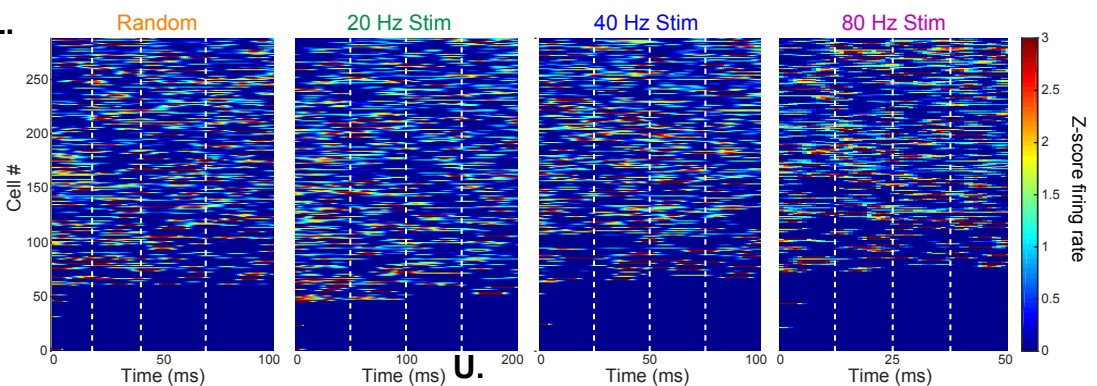**M.**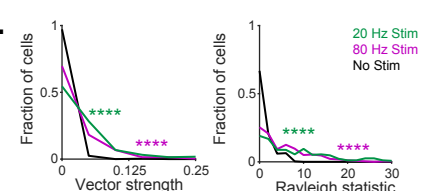**N.**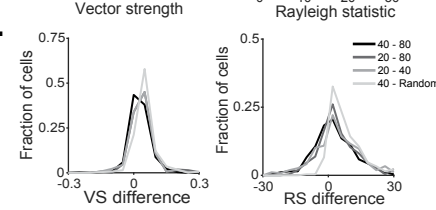**O. Prefrontal Cortex**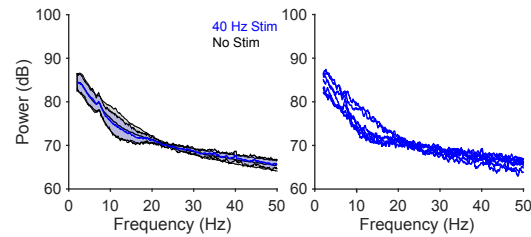**P.**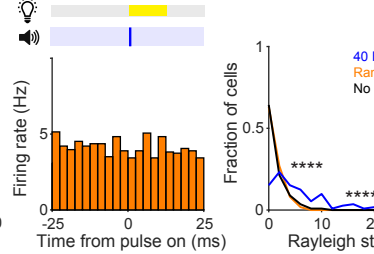**Q.**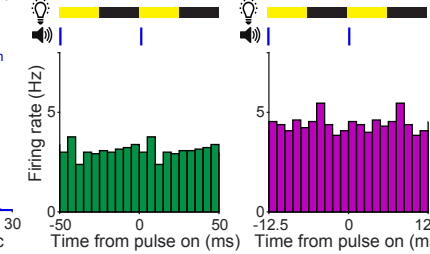**R.**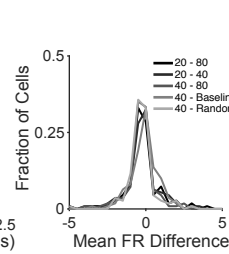**S.**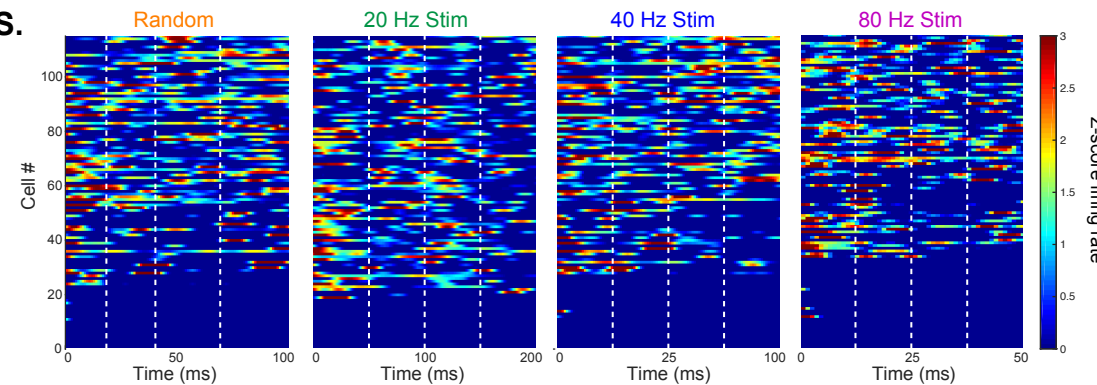**T.**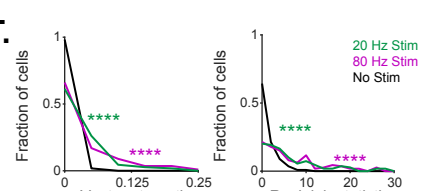**U.**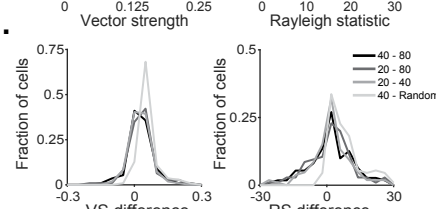

Supplement: NIHMS1538841-supplement-12.pdf [file NIHMS1538841-supplement-12.pdf]
